# Supplementary material for: Production of Proinflammatory Cytokines by CD4+ and CD8+ T Cells in Response to Mycobacterial Antigens among Children and Adults with Tuberculosis
Source: MDPI journal article supplement (doi:10.3390/pathogens12111353), 2023-11-14
Supplement: s1 [file s1]

**Supplemental Table S1. Median percentages of CD4+ and CD8+ T cell responsive to Mycobacterial antigens and SEB among children and adults with TB and non-TB pneumonia**

|                               | <b>Peds Conf. TB<br/>(median; IQR)</b> | <b>Peds Unconf. TB<br/>(median; IQR)</b> | <b>Peds non-TB PNA<br/>(median; IQR)</b> | <b>Adult Conf. TB<br/>(median; IQR)</b> | <b>Adjusted p-value</b> |
|-------------------------------|----------------------------------------|------------------------------------------|------------------------------------------|-----------------------------------------|-------------------------|
| <b>CD4+ T cell: IFN-gamma</b> |                                        |                                          |                                          |                                         |                         |
| Esat6/CFP10                   | 0.05571<br>(0.19009)                   | 0.0000<br>(0.00000)                      | 0.0000<br>(0.00000)                      | 0.0805<br>(0.11220)                     | <0.0001                 |
| ESXJ                          | 0 (0)                                  | 0 (0)                                    | 0 (0)                                    | 0 (0)                                   | 0.006342                |
| PE12/PE13                     | 0.0000<br>(0.0677)                     | 0.0000<br>(0.0000)                       | 0.0000<br>(0.0000)                       | 0.0619<br>(0.0802)                      | <0.0001                 |
| PE3                           | 0.0000<br>(0.126525)                   | 0.0000<br>(0.00000)                      | 0.0000<br>(0.00000)                      | 0.1263<br>(0.07080)                     | <0.0001                 |
| PPE15                         | 0.0000<br>(0.1025)                     | 0.0000<br>(0.0000)                       | 0.0000<br>(0.0000)                       | 0.1451<br>(0.0828)                      | <0.0001                 |
| PPE51                         | 0.0000<br>(0.03235)                    | 0.0000<br>(0.0000)                       | 0.0000<br>(0.0000)                       | 0.0557<br>(0.08320)                     | <0.0001                 |
| SEB                           | 0.25100<br>(0.271325)                  | 0.22200<br>(0.317000)                    | 0.15050<br>(0.241400)                    | 2.78825<br>(3.282775)                   | <0.0001                 |
| <b>CD4+ T cell: TNF-alpha</b> |                                        |                                          |                                          |                                         |                         |
| Esat6/CFP10                   | 0.102135<br>(0.22205)                  | 0.000000<br>(0.00000)                    | 0.000000<br>(0.00000)                    | 0.170800<br>(0.19880)                   | <0.0001                 |
| ESXJ                          | 0<br>(0.0000)                          | 0<br>(0.0000)                            | 0<br>(0.0000)                            | 0<br>(0.0776)                           | <0.0001                 |
| PE12/PE13                     | 0.0722<br>(0.1117)                     | 0.0000<br>(0.0000)                       | 0.0000<br>(0.0000)                       | 0.0850<br>(0.2080)                      | <0.0001                 |
| PE3                           | 0.000<br>(0.1486)                      | 0.000<br>(0.0000)                        | 0.000<br>(0.0000)                        | 0.209<br>(0.3040)                       | <0.0001                 |
| PPE15                         | 0.05575<br>(0.185625)                  | 0.00000<br>(0.000000)                    | 0.00000<br>(0.000000)                    | 0.23250<br>(0.280900)                   | <0.0001                 |
| PPE51                         | 0.0000<br>(0.0736)                     | 0.0000<br>(0.0000)                       | 0.0000<br>(0.0000)                       | 0.0587<br>(0.1376)                      | <0.0001                 |
| SEB                           | 6.70725<br>(4.716152)                  | 6.96418<br>(4.301300)                    | 7.90370<br>(5.159713)                    | 10.95350<br>(10.702475)                 | <0.0001                 |
| <b>CD4+ T cell: IL-2</b>      |                                        |                                          |                                          |                                         |                         |
| Esat6/CFP10                   | 0.07555<br>(0.24525)                   | 0.00000<br>(0.00000)                     | 0.00000<br>(0.00000)                     | 0.05160<br>(0.11160)                    | <0.0001                 |
| ESXJ                          | 0<br>(0)                               | 0<br>(0)                                 | 0<br>(0)                                 | 0<br>(0)                                | 0.2474                  |
| PE12/PE13                     | 0<br>(0.1155)                          | 0<br>(0)                                 | 0<br>(0)                                 | 0<br>(0)                                | 0.008999                |
| PE3                           | 0.080300<br>(0.120700)                 | 0.066825<br>(0.094675)                   | 0.070500<br>(0.041100)                   | 0.000000<br>(0.000000)                  | <0.0001                 |
| PPE15                         | 0.102250<br>(0.061650)                 | 0.061455<br>(0.097075)                   | 0.070000<br>(0.084900)                   | 0.000000<br>(0.052300)                  | <0.0001                 |
| PPE51                         | 0 (0) (0.06155)                        | 0 (0) (0.00000)                          | 0 (0) (0.00000)                          | 0 (0) 0.07120                           | <0.0001                 |
| SEB                           | 0.88230<br>(2.111327)                  | 0.96680<br>(1.266800)                    | 0.73155<br>(0.637950)                    | 9.97050<br>(10.990310)                  | <0.0001                 |

|                                      | Peds Conf. TB<br>(median; IQR) | Peds Unconf. TB<br>(median;<br>IQR) | Peds non-<br>TB PNA<br>(median;<br>IQR) | Adult Conf.<br>TB<br>(median;<br>IQR) | Adjusted p-<br>value |
|--------------------------------------|--------------------------------|-------------------------------------|-----------------------------------------|---------------------------------------|----------------------|
| CD4+ T cell: IFN-gamma and IL-2      |                                |                                     |                                         |                                       |                      |
| Esat6/CFP10                          | 0.03045<br>(0.2110418)         | 0.00000<br>(0.0000000)              | 0.00000 (0.<br>0000000)                 | 0.00000<br>(0.0621000)                | 0.0001419            |
| ESXJ                                 | 0<br>(0)                       | 0<br>(0)                            | 0<br>(0)                                | 0<br>(0)                              | 0.4476               |
| PE12/PE13                            | 0<br>(0.0807)                  | 0<br>(0.0000)                       | 0<br>(0.0000)                           | 0<br>(0.0000)                         | 0.006617             |
| PE3                                  | 0<br>(0)                       | 0<br>(0)                            | 0<br>(0)                                | 0<br>(0)                              | 0.3655               |
| PPE15                                | 0<br>(0)                       | 0<br>(0)                            | 0<br>(0)                                | 0<br>(0)                              | 0.1132               |
| PPE51                                | 0<br>(0)                       | 0<br>(0)                            | 0<br>(0)                                | 0<br>(0)                              | 0.07562              |
| SEB                                  | 0.23300<br>(0.3954493)         | 0.32082<br>(0.4020000)              | 0.26325<br>(0.2681600)                  | 0.88728<br>(1.5365700)                | <0.0001              |
| CD4+ T cell: IFN-gamma and TNF-alpha |                                |                                     |                                         |                                       |                      |
| Esat6/CFP10                          | 0.07615 (0.2612)               | 0.00000<br>(0.0000)                 | 0.00000<br>(0.0000)                     | 0.07316<br>(0.1036)                   | <0.0001              |
| ESXJ                                 | 0<br>(0)                       | 0<br>(0)                            | 0<br>(0)                                | 0<br>(0)                              | 0.5434               |
| PE12/PE13                            | 0<br>(0.07575)                 | 0<br>(0.00000)                      | 0<br>(0.00000)                          | 0<br>(0.00000)                        | 0.001549             |
| PE3                                  | 0.0702<br>(0.10200)            | 0.0000<br>(0.00000)                 | 0.0000<br>(0.00000)                     | 0.0000<br>(0.05311)                   | 0.006263             |
| PPE15                                | 0.0686<br>(0.160475)           | 0.0000<br>(0.00000)                 | 0.0000<br>(0.00000)                     | 0.0000<br>(0.052100)                  | 0.02991              |
| PPE51                                | 0<br>(0.11845)                 | 0<br>(0.00000)                      | 0<br>(0.00000)                          | 0<br>(0.00000)                        | 0.001748             |
| SEB                                  | 0.37505<br>(0.480150)          | 0.40050<br>(0.671400)               | 0.37390<br>(0.395450)                   | 1.53781<br>(2.324067)                 | <0.0001              |
| CD4+ T cell: TNF-alpha and IL-2      |                                |                                     |                                         |                                       |                      |
| Esat6/CFP10                          | 0.068245<br>(0.2758825)        | 0.000000<br>(0.0000000)             | 0.000000<br>(0.0000000)                 | 0.000000<br>(0.1075000)               | <0.0001              |
| ESXJ                                 | 0<br>(0)                       | 0<br>(0)                            | 0<br>(0)                                | 0<br>(0)                              | 0.0914               |
| PE12/PE13                            | 0 (0.073595)                   | 0 (0.000000)                        | 0 (0.000000)                            | 0 (0.000000)                          | 0.001875             |
| PE3                                  | 0 (0)                          | 0 (0)                               | 0 (0)                                   | 0 (0)                                 | 0.05899              |
| PPE15                                | 0 (0.01468)                    | 0 (0.00000)                         | 0 (0.00000)                             | 0 (0.00000)                           | 0.01925              |
| PPE51                                | 0 (0.00000)                    | 0 (0.00000)                         | 0 (0.00000)                             | 0 (0.06529)                           | 0.001141             |
| SEB                                  | 4.403295<br>(2.54745)          | 3.435180<br>(3.90450)               | 3.526900<br>(2.87480)                   | 4.857400<br>(7.72675)                 | 0.02025              |

|                                            | Peds Conf. TB<br>(median; IQR) | Peds<br>Unconf. TB<br>(median;<br>IQR) | Peds non-<br>TB PNA<br>(median;<br>IQR) | Adult Conf.<br>TB<br>(median;<br>IQR) | Adjusted p-<br>value |
|--------------------------------------------|--------------------------------|----------------------------------------|-----------------------------------------|---------------------------------------|----------------------|
| CD4+ T cell: IFN-gamma, TNF-alpha and IL-2 |                                |                                        |                                         |                                       |                      |
| Esat6/CFP10                                | 0.03045<br>(0.2002918)         | 0.00000<br>(0.0000000)                 | 0.00000<br>(0.0000000)                  | 0.00000<br>(0.0593000)                | 0.0001358            |
| ESXJ                                       | 0 (0)                          | 0 (0)                                  | 0 (0)                                   | 0 (0)                                 | 0.4467               |
| PE12/PE13                                  | 0 (0.059)                      | 0 (0.000)                              | 0 (0.000)                               | 0 (0.000)                             | 0.007623             |
| PE3                                        | 0 (0)                          | 0 (0)                                  | 0 (0)                                   | 0 (0)                                 | 0.3655               |
| PPE15                                      | 0 (0)                          | 0 (0)                                  | 0 (0)                                   | 0 (0)                                 | 0.1296               |
| PPE51                                      | 0 (0)                          | 0 (0)                                  | 0 (0)                                   | 0 (0)                                 | 0.07562              |
| SEB                                        | 0.1795<br>(0.2863668)          | 0.2590<br>(0.3170000)                  | 0.1980<br>(0.1965915)                   | 0.6520<br>(1.2294370)                 | <0.0001              |
| CD8+ T cell: IFN-gamma                     |                                |                                        |                                         |                                       |                      |
| Esat6/CFP10                                | 0.03515<br>(0.1525175)         | 0 (0)                                  | 0 (0)                                   | 0.06640<br>(0.2182000)                | <0.0001              |
| ESXJ                                       | 0 (0.065725)                   | 0 (0)                                  | 0 (0)                                   | 0 (0)                                 | 0.04557              |
| PE12/PE13                                  | 0 (0)                          | 0 (0)                                  | 0 (0)                                   | 0 (0.0665)                            | 0.001425             |
| PE3                                        | 0.13050<br>(0.096325)          | 0.09145<br>(0.062050)                  | 0.08920<br>(0.047295)                   | 0.13830<br>(0.090800)                 | 0.001455             |
| PPE15                                      | 0.1378 (0.13270)               | 0.0783<br>(0.05575)                    | 0.0876<br>(0.06285)                     | 0.1369<br>(0.13680)                   | 0.003341             |
| PPE51                                      | 0 (0)                          | 0 (0)                                  | 0 (0)                                   | 0 (0.0562)                            | <0.0001              |
| SEB                                        | 4.8587 (4.32340)               | 3.3616<br>(3.26270)                    | 2.6302<br>(2.12060)                     | 6.3018<br>(7.35015)                   | <0.0001              |
| CD8+ T cell: TNF-alpha                     |                                |                                        |                                         |                                       |                      |
| Esat6/CFP10                                | 0.10115<br>(0.59427)           | 0 (0)                                  | 0 (0)                                   | 0.11990<br>(0.32200)                  | <0.0001              |
| ESXJ                                       | 0 (0.018475)                   | 0 (0)                                  | 0 (0)                                   | 0 (0.052800)                          | 0.002138             |
| PE12/PE13                                  | 0 (0.05735)                    | 0 (0)                                  | 0 (0)                                   | 0.0674<br>(0.15100)                   | <0.0001              |
| PE3                                        | 0 (0.2642)                     | 0.0536<br>(0.0952)                     | 0 (0.0703)                              | 0.1397<br>(0.2629)                    | 0.0007363            |
| PPE15                                      | 0.0520<br>(0.141425)           | 0.0512<br>(0.103275)                   | 0.0570<br>(0.100850)                    | 0.1468<br>(0.319000)                  | 0.006588             |
| PPE51                                      | 0 (0.02825)                    | 0 (0)                                  | 0 (0)                                   | 0 (0)                                 | 0.1573               |
| SEB                                        | 2.63295<br>(2.902925)          | 1.78800<br>(2.967400)                  | 1.30670<br>(2.638350)                   | 4.91950<br>(5.178275)                 | <0.0001              |

|                                            | Peds Conf. TB<br>(median; IQR) | Peds Unconf. TB<br>(median;<br>IQR) | Peds non-<br>TB PNA<br>(median;<br>IQR) | Adult Conf.<br>TB<br>(median;<br>IQR) | Adjusted p-<br>value |
|--------------------------------------------|--------------------------------|-------------------------------------|-----------------------------------------|---------------------------------------|----------------------|
| CD8+ T cell: IL-2                          |                                |                                     |                                         |                                       |                      |
| Esat6/CFP10                                | 0 (0)                          | 0 (0)                               | 0 (0)                                   | 0 (0)                                 | 0.6957               |
| ESXJ                                       | 0 (0)                          | 0 (0)                               | 0 (0)                                   | 0 (0)                                 | 0.03083              |
| PE12/PE13                                  | 0 (0)                          | 0 (0)                               | 0 (0)                                   | 0 (0)                                 | 0.7464               |
| PE3                                        | 0 (0)                          | 0 (0)                               | 0 (0)                                   | 0 (0)                                 | 0.1994               |
| PPE15                                      | 0 (0)                          | 0 (0)                               | 0 (0)                                   | 0 (0)                                 | 0.01367              |
| PPE51                                      | 0 (0)                          | 0 (0)                               | 0 (0)                                   | 0 (0)                                 | 0.4947               |
| SEB                                        | 0.293430<br>(0.834800)         | 0.448800<br>(0.635300)              | 0.500005<br>(0.714030)                  | 0.986470<br>(1.576855)                | 0.0006457            |
| CD8+ T cell: IFN-gamma and IL-2            |                                |                                     |                                         |                                       |                      |
| Esat6/CFP10                                | 0 (0)                          | 0 (0)                               | 0 (0)                                   | 0 (0)                                 | 0.2834               |
| ESXJ                                       | 0 (0)                          | 0 (0)                               | 0 (0)                                   | 0 (0)                                 | NA                   |
| PE12/PE13                                  | 0 (0)                          | 0 (0)                               | 0 (0)                                   | 0 (0)                                 | 0.5524               |
| PE3                                        | 0 (0)                          | 0 (0)                               | 0 (0)                                   | 0 (0)                                 | 0.03083              |
| PPE15                                      | 0 (0)                          | 0 (0)                               | 0 (0)                                   | 0 (0)                                 | 0.01071              |
| PPE51                                      | 0 (0)                          | 0 (0)                               | 0 (0)                                   | 0 (0)                                 | 0.5426               |
| SEB                                        | 0 (0.063620)                   | 0 (0.113000)                        | 0 (0.065535)                            | 0.21302<br>(0.362390)                 | <0.0001              |
| CD8+ T cell: IFN-gamma and TNF-alpha       |                                |                                     |                                         |                                       |                      |
| Esat6/CFP10                                | 0.0353 (0.15145)               | 0 (0)                               | 0 (0)                                   | 0 (0.12255)                           | <0.0001              |
| ESXJ                                       | 0 (0)                          | 0 (0)                               | 0 (0)                                   | 0 (0)                                 | 0.03616              |
| PE12/PE13                                  | 0 (0)                          | 0 (0)                               | 0 (0)                                   | 0 (0)                                 | 0.8104               |
| PE3                                        | 0 (0.0906625)                  | 0 (0)                               | 0 (0)                                   | 0 (0)                                 | 0.009815             |
| PPE15                                      | 0 (0.0127)                     | 0 (0)                               | 0 (0)                                   | 0 (0)                                 | 0.108                |
| PPE51                                      | 0 (0.0353)                     | 0 (0)                               | 0 (0)                                   | 0 (0)                                 | 0.002409             |
| SEB                                        | 1.71110<br>(1.905750)          | 0.73030<br>(1.521600)               | 0.63943<br>(0.705985)                   | 2.13662<br>(3.757270)                 | <0.0001              |
| CD8+ T cell: TNF-alpha and IL-2            |                                |                                     |                                         |                                       |                      |
| Esat6/CFP10                                | 0 (0)                          | 0 (0)                               | 0 (0)                                   | 0 (0)                                 | 0.2826               |
| ESXJ                                       | 0 (0)                          | 0 (0)                               | 0 (0)                                   | 0 (0)                                 | NA                   |
| PE12/PE13                                  | 0 (0)                          | 0 (0)                               | 0 (0)                                   | 0 (0)                                 | 0.5524               |
| PE3                                        | 0 (0)                          | 0 (0)                               | 0 (0)                                   | 0 (0)                                 | 0.5377               |
| PPE15                                      | 0 (0)                          | 0 (0)                               | 0 (0)                                   | 0 (0)                                 | NA                   |
| PPE51                                      | 0 (0)                          | 0 (0)                               | 0 (0)                                   | 0 (0)                                 | 0.5426               |
| SEB                                        | 0.08145<br>(0.307000)          | 0.10247<br>(0.214000)               | 0.08620<br>(0.181895)                   | 0.31688<br>(0.631000)                 | <0.0001              |
| CD8+ T cell: IFN-gamma, TNF-alpha and IL-2 |                                |                                     |                                         |                                       |                      |
| Esat6/CFP10                                | 0 (0)                          | 0 (0)                               | 0 (0)                                   | 0 (0)                                 | 0.415                |
| ESXJ                                       | 0 (0)                          | 0 (0)                               | 0 (0)                                   | 0 (0)                                 | NA                   |
| PE12/PE13                                  | 0 (0)                          | 0 (0)                               | 0 (0)                                   | 0 (0)                                 | NA                   |
| PE3                                        | 0 (0)                          | 0 (0)                               | 0 (0)                                   | 0 (0)                                 | 0.5377               |
| PPE15                                      | 0 (0)                          | 0 (0)                               | 0 (0)                                   | 0 (0)                                 | NA                   |
| PPE51                                      | 0 (0)                          | 0 (0)                               | 0 (0)                                   | 0 (0)                                 | NA                   |
| SEB                                        | 0 (0)                          | 0 (0.0616)                          | 0 (0)                                   | 0.108<br>(0.2280)                     | <0.0001              |

A

## Adult confirmed TB

## Pediatric confirmed TB

B

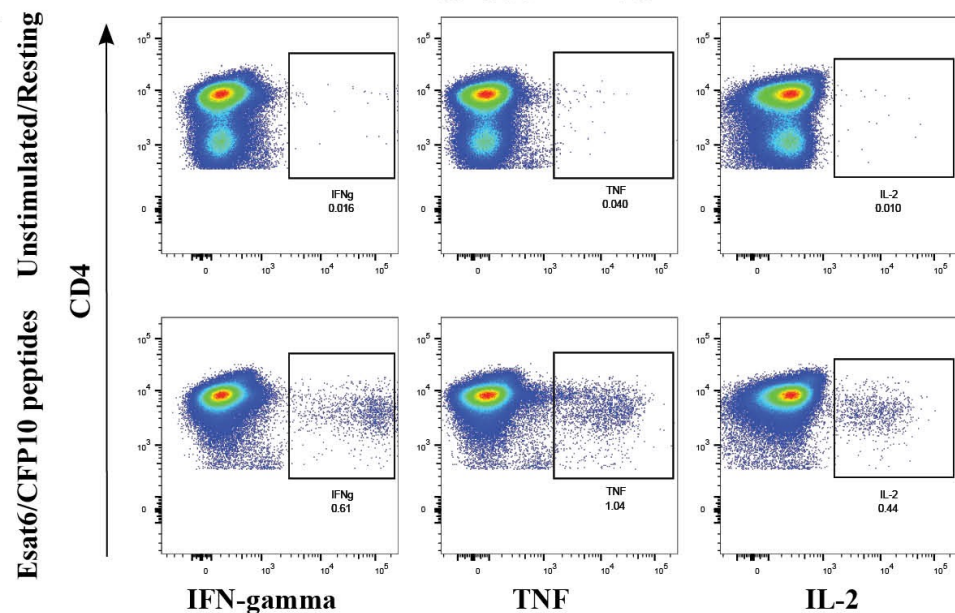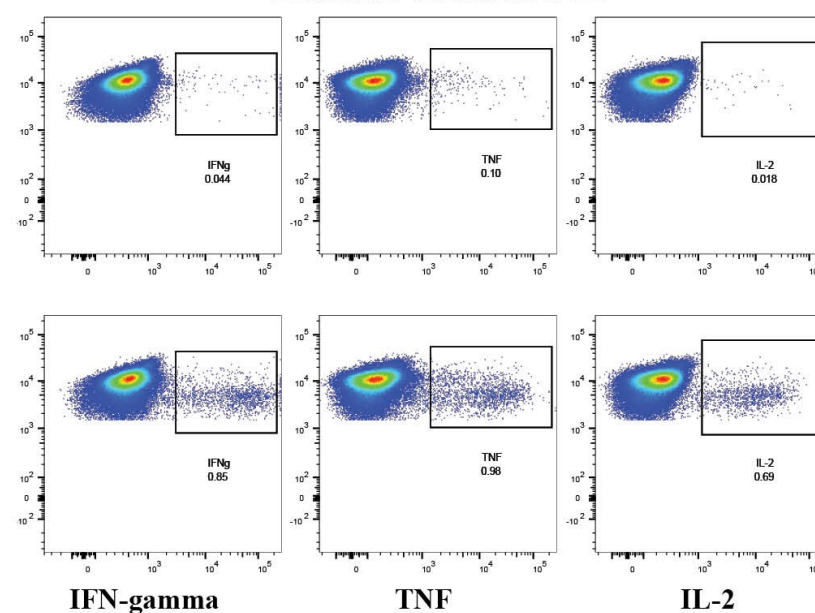

A

## Pediatric unconfirmed TB

## Pediatric Non-TB LRTI

B

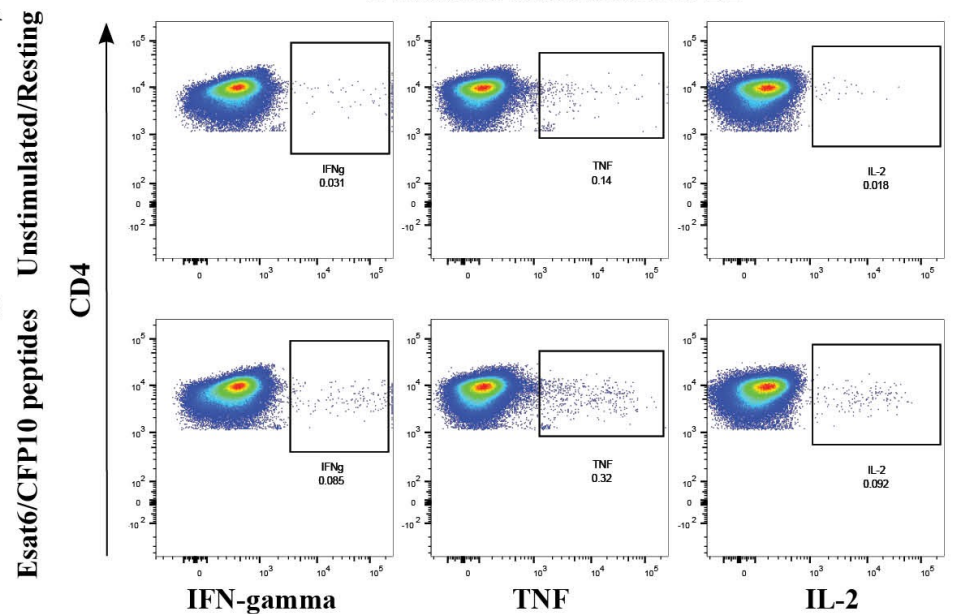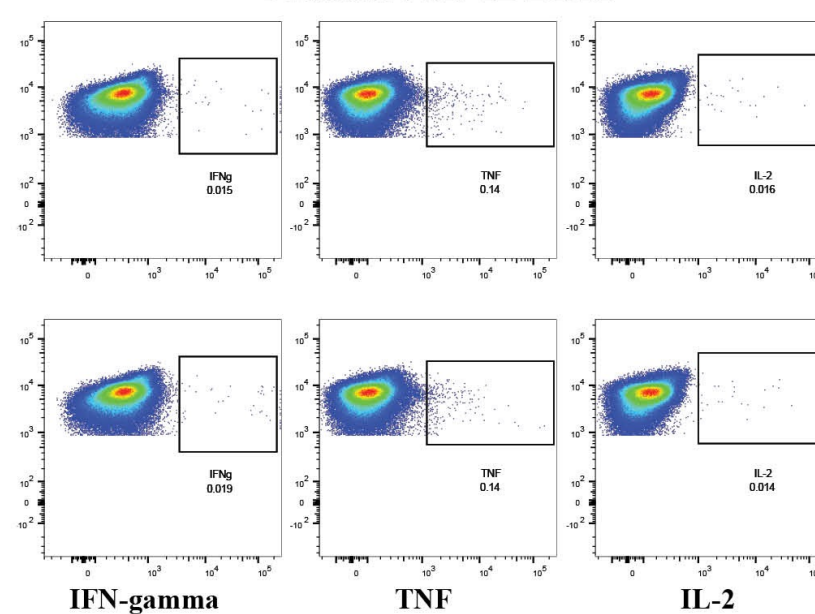

**Supplemental Figure S1.**  
**Representative data demonstrating intracellular production of IFN-gamma, TNF-alpha and IL-2 by CD3+CD4+ T cells.** PBMC were thawed in batches, rested overnight, and CD3+CD4+ T cell production of IFN- $\gamma$ , TNF-alpha and IL-2 in unstimulated (A) and ESAT-6/CFP-10 stimulated (10  $\mu$ g/ml) cells analyzed by intracellular flow cytometry following 18 hours of incubation. Shown are representative data from an adult with confirmed TB, and children with confirmed and unconfirmed TB, as well as non-TB LRTI.
